# Supplementary material
Source: MDPI journal article supplement (https://www.mdpi.com/2073-4352/14/5/463)
Supplement: s1 [file s1]

## **Supporting Information**

### **Mineralization of octacalcium phosphate under magnetic field**

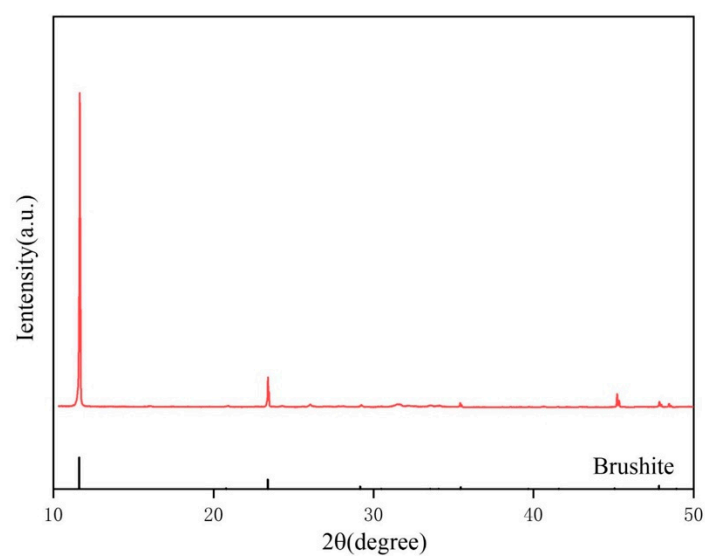

Figure S1. XRD pattern of DCPD crystals generated in gel medium.

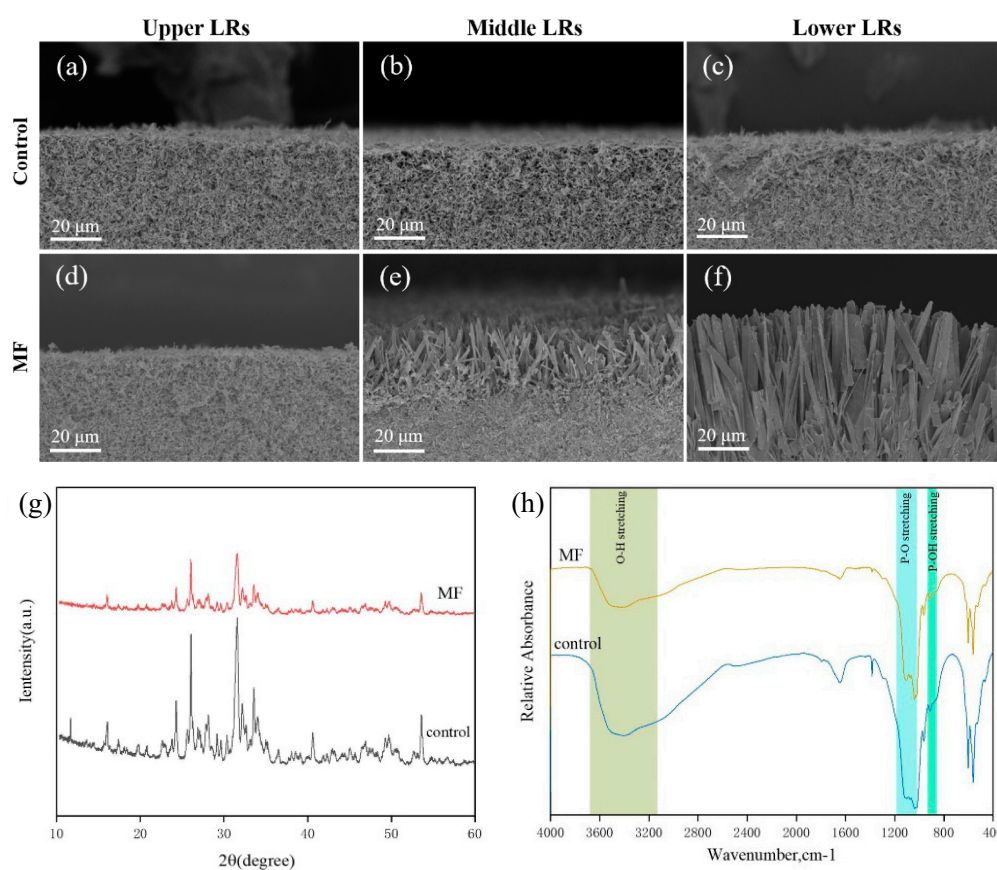

Figure S2. SEM images of LR in samples after mineralization at 25°C for 14 days (a, b, c) without magnetic field, (d, e, f) with magnetic field; (g) XRD and (h) FT-IR of Lower LR

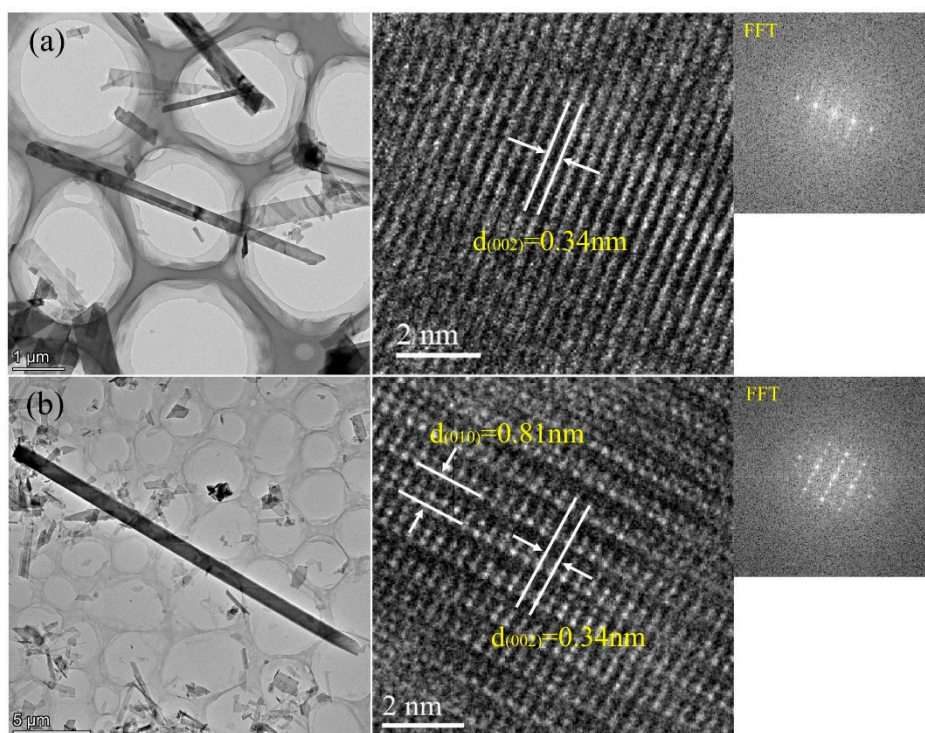

Figure S3 HRTEM images and corresponding FFT patterns of belt-like particle (a) Sample of Lower LR without magnetic field at 37°C (b) Sample of Lower LR with magnetic field at 37°C.
